# Supplementary material for: Silyl diol ester as a new selectivity control agent in MgCl2-supported Ziegler–Natta systems for propylene polymerization: catalyst structure and polymer properties
Source: Royal Society of Chemistry journal article supplement (doi:10.1039/c9ra00715f), 2019-01-01
Supplement: c9ra00715f1.pdf [file c9ra00715f1.pdf]

## Electronic Supplementary Information (ESI) for RSC Advances.

### Silyl diol ester as a new selectivity control agent in $MgCl_2$ -supported Ziegler-Natta systems for Propylene polymerization: catalyst structure and polymer properties

Fatemeh Poorsank,<sup>a</sup> Hassan Arabi<sup>\*a</sup> and Nona Ghasemi Hamedani<sup>a</sup>

Department of Polymerization Engineering, Iran Polymer and Petrochemical Institute,

P.O. Box: 14965/115, Tehran, Iran

E-mail: h.arabi@ippi.ac.ir

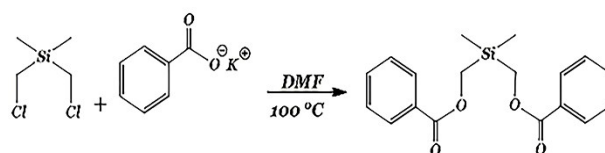

Figure S1 Synthetic route of silyl diol ester

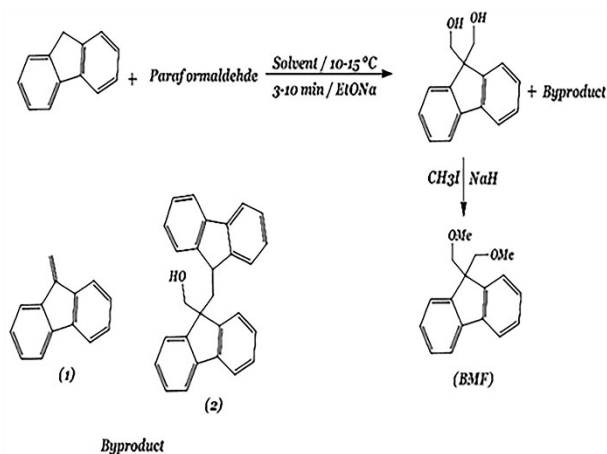

Figure S2 Synthetic route of 9, 9-bis (methoxymethyl) fluorene

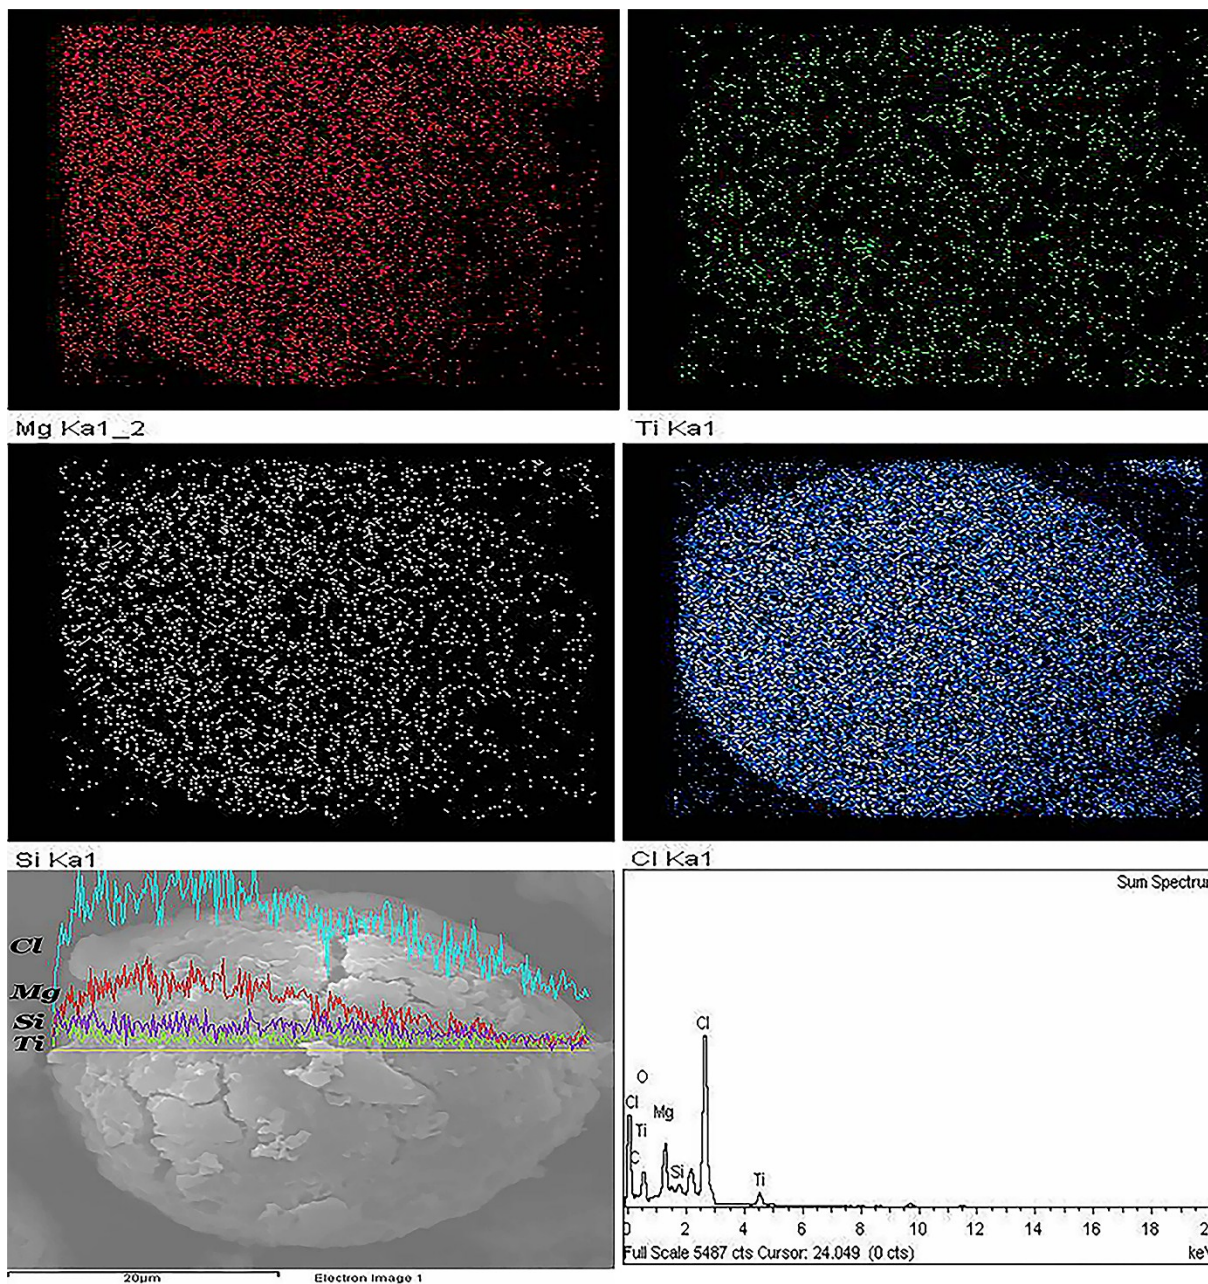

**Figure S3 SEM photograph of cross-section of catalyst A3 particle and the element distribution data. The curves on the particle are the element distributions along the line (top to bottom): Cl, Mg, Si and Ti**

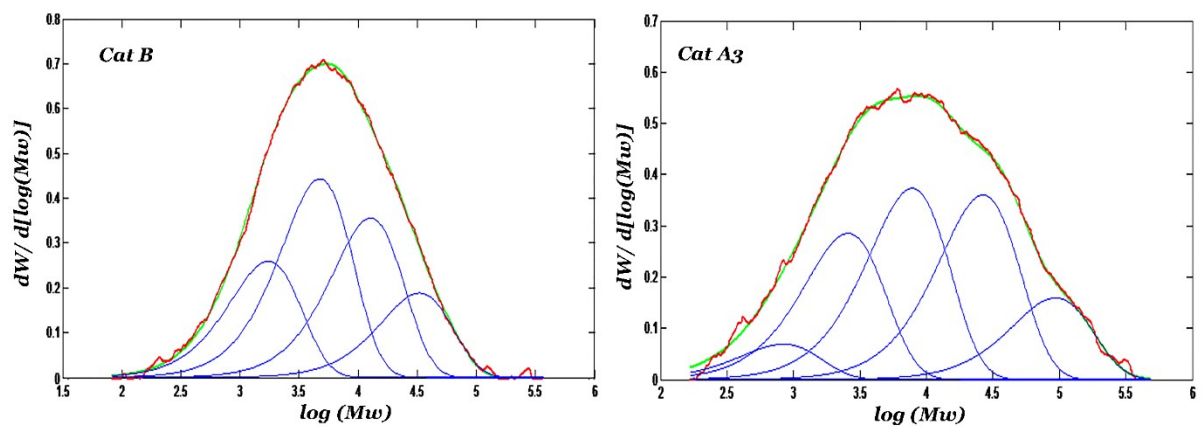

Figure S4 Molecular weight distribution of catalysts: B and A<sub>3</sub>

---

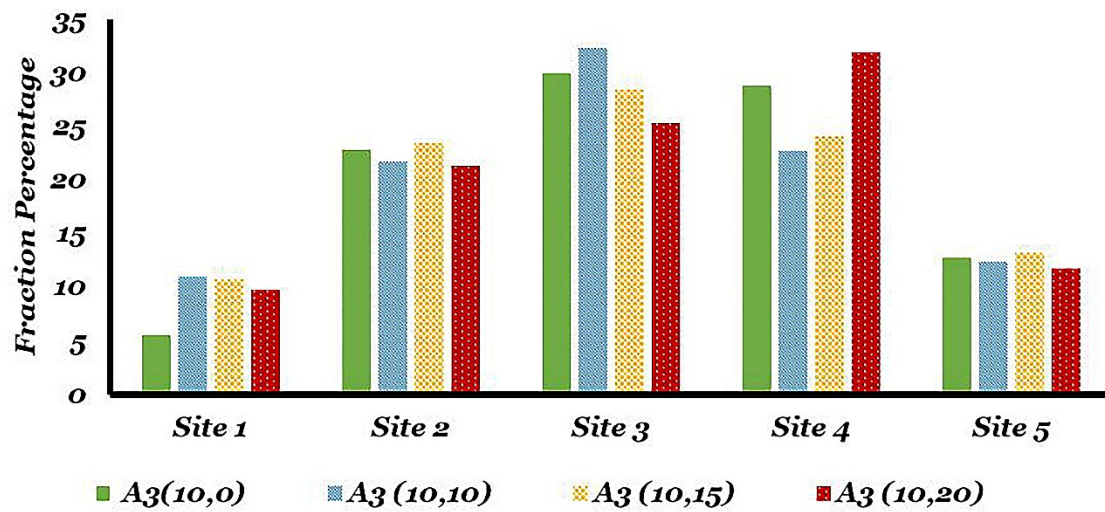

Figure S5 Effect of ED/cat ratio on fraction percentage of different sites

**Table S1. Effect of the ED/cat ratio on the performances of the catalyst catalyst A<sub>3</sub>**

| ED <sup>a</sup> /Cat  | 0      | 0.5    | 0.66   | 1      |
|-----------------------|--------|--------|--------|--------|
| Activity <sup>b</sup> | 2.06   | 1.3    | 1.53   | 1.48   |
| I.I (%) <sup>c</sup>  | 97.6   | 96.3   | 97.4   | 96.3   |
| M <sub>n</sub>        | 84000  | 141000 | 152000 | 134600 |
| M <sub>w</sub>        | 647000 | 964000 | 943000 | 887000 |
| PDI                   | 7.71   | 6.85   | 6.22   | 6.59   |

<sup>a</sup>external donor: C-donor; <sup>b</sup> polymerization conditions: 20 mg catalyst, TEA/cat: 10, <sup>c</sup> xylene solubility.

**Table S2. Effect of the TEA/cat ratios on the performances of the catalyst A<sub>3</sub>**

| TEA/Cat              | 5      | 10     | 20     |
|----------------------|--------|--------|--------|
| Activity             | 0.98   | 1.53   | 1.39   |
| I.I (%) <sup>b</sup> | 95.6   | 97.4   | 96.72  |
| M <sub>n</sub>       | 133000 | 152000 | 76000  |
| M <sub>w</sub>       | 943000 | 943000 | 758000 |
| PDI                  | 7.07   | 6.22   | 10.00  |

<sup>a</sup>Polymerization conditions: 20 mg catalyst, ED/cat= 0.66, external donor: C-donor, <sup>b</sup> xylene solubility.

**Table S3. Hydrogen response of catalysts: A<sub>3</sub>, D and B**

| Catalyst       | H <sub>2</sub> (mmol) | Activity | I.I   | MFR    |
|----------------|-----------------------|----------|-------|--------|
| D              | 2.25                  | 2.69     | 98.7  | 16.91  |
| D              | 4.5                   | 4.32     | 99.3  | 24.1   |
| D              | 9                     | 3.94     | 98.74 | 57.88  |
| D              | 13.5                  | 2.11     | 98.74 | 117.38 |
| A <sub>3</sub> | 1.12                  | 2.45     | 98.78 | 4.55   |
| A <sub>3</sub> | 2.25                  | 3.48     | 96.66 | 7.18   |
| A <sub>3</sub> | 4.5                   | 2.02     | 96.03 | 14.9   |
| A <sub>3</sub> | 6.75                  | 2.16     | 95.68 | 21.1   |
| A <sub>3</sub> | 13.5                  | 3.40     | 93.97 | 67.1   |
| B              | 2.25                  | 4.34     | 99.7  | 17.85  |
| B              | 4.5                   | 3.75     | 99.2  | 35.37  |
| B              | 9                     | 4.04     | 98.46 | 120.44 |

**Table S4. Result of deconvolution the MWD curve of catalysts: A<sub>3</sub> and B**

| Catalyst | Site 1                      |                             | Site 2         |                | Site 3         |                | Site 4         |                | Site 5         |                | Site 6         |                |
|----------|-----------------------------|-----------------------------|----------------|----------------|----------------|----------------|----------------|----------------|----------------|----------------|----------------|----------------|
|          | F <sub>r</sub> <sup>a</sup> | M <sub>w</sub> <sup>b</sup> | F <sub>r</sub> | M <sub>w</sub> |
| B        | 20.8                        | 2.43                        | 35.56          | 6.64           | 28.53          | 17.89          | 15.11          | 46.29          |                |                |                |                |

A<sub>3</sub>      5.53   1.18   22.88   3.61   29.93   10.97   28.87   37.32   12.79   130.98

---

<sup>a</sup>F<sub>r</sub> was the weight percentage of the fraction produced by a certain active centre in catalyst.

<sup>b</sup> Weight average molecular weight, in 10<sup>4</sup> g/mol.

---

---

**Table S5. Effect of ED/cat ratio on active centers of catalyst A<sub>3</sub>**

---

|         |        | Site 1                      |                             | Site 2         |                | Site 3         |                | Site 4         |                | Site 5         |                |
|---------|--------|-----------------------------|-----------------------------|----------------|----------------|----------------|----------------|----------------|----------------|----------------|----------------|
| TEA/Cat | TEA/ED | F <sub>r</sub> <sup>a</sup> | M <sub>w</sub> <sup>b</sup> | F <sub>r</sub> | M <sub>w</sub> |
| 10      | 0      | 5.53                        | 1.18                        | 22.88          | 3.61           | 29.93          | 10.97          | 28.87          | 37.32          | 12.79          | 130.98         |
| 10      | 10     | 10.96                       | 2.61                        | 21.67          | 7.97           | 32.3           | 26.69          | 22.72          | 62.67          | 12.34          | 157.26         |
| 10      | 15     | 10.81                       | 3.03                        | 23.45          | 8.73           | 28.43          | 26.45          | 24.11          | 61.84          | 13.2           | 171.22         |
| 10      | 20     | 9.74                        | 2.79                        | 21.30          | 7.9            | 25.37          | 21.77          | 31.89          | 59.71          | 11.69          | 190.95         |

---

<sup>a</sup>F<sub>r</sub> was the weight percentage of the fraction produced by a certain active center in catalyst.

<sup>b</sup> Weight average molecular weight, in 10<sup>4</sup> g/mol.

---
